# Supplementary material for: Nickel complexes incorporating an amido phosphine chelate with a pendant amine arm: Synthesis, structure, and catalytic Kumada coupling
Source: Royal Society of Chemistry journal article supplement (doi:10.1039/c1dt11338k), 2011-11-30
Supplement: c1dt11338k.pdf [file c1dt11338k.pdf]

Electronic Supplementary Information

for

**Nickel Complexes Incorporating an Amido Phosphine Chelate with a Pendant Amine Arm: Synthesis, Structure, and Catalytic Kumada Coupling**

Lan-Chang Liang,\* Wei-Ying Lee, Yu-Ting Hung, Yi-Chen Hsiao, Liang-Chien Cheng, and Wei-Chen Chen

Department of Chemistry and Center for Nanoscience & Nanotechnology, National Sun Yat-sen University, Kaohsiung 80424, Taiwan

E-mail: [lcliang@mail.nsysu.edu.tw](mailto:lcliang@mail.nsysu.edu.tw)

**Contents**

- **Table S1.** Crystal data and structure refinement for  $\{\text{Li}[\text{PNN}]\}_2$ .
- **Table S2.** Crystal data and structure refinement for  $[\text{PNN}]\text{NiCl}$ .
- **Table S3.** Crystal data and structure refinement for  $[\text{PNN}]\text{NiBr}$ .
- **Table S4.** Crystal data and structure refinement for  $[\text{PNN}]\text{NiMe}$ .
- **Table S5.** Crystal data and structure refinement for  $[\text{PNN}]\text{NiEt}$ .
- **Table S6.** Crystal data and structure refinement for  $[\text{PNN}]\text{Ni}(n\text{-hexyl})$ .

**Table S1.** Crystal data and structure refinement for {Li[PNN]}<sub>2</sub>.

|                                   |                                             |                    |
|-----------------------------------|---------------------------------------------|--------------------|
| Identification code               | a7162                                       |                    |
| Empirical formula                 | C44 H48 Li2 N4 P2                           |                    |
| Formula weight                    | 708.68                                      |                    |
| Temperature                       | 200(2) K                                    |                    |
| Wavelength                        | 0.71073 Å                                   |                    |
| Crystal system                    | Monoclinic                                  |                    |
| Space group                       | P 21/c                                      |                    |
| Unit cell dimensions              | a = 16.1085(4) Å                            | α = 90°.           |
|                                   | b = 14.1250(5) Å                            | β = 109.3690(10)°. |
|                                   | c = 18.6374(6) Å                            | γ = 90°.           |
| Volume                            | 4000.6(2) Å <sup>3</sup>                    |                    |
| Z                                 | 4                                           |                    |
| Density (calculated)              | 1.177 Mg/m <sup>3</sup>                     |                    |
| Absorption coefficient            | 0.144 mm <sup>-1</sup>                      |                    |
| F(000)                            | 1504                                        |                    |
| Crystal size                      | 0.35 x 0.32 x 0.1 mm <sup>3</sup>           |                    |
| Theta range for data collection   | 1.97 to 25.02°.                             |                    |
| Index ranges                      | -18 ≤ h ≤ 19, -16 ≤ k ≤ 16, -22 ≤ l ≤ 22    |                    |
| Reflections collected             | 26529                                       |                    |
| Independent reflections           | 7006 [R(int) = 0.0486]                      |                    |
| Completeness to theta = 25.02°    | 99.2 %                                      |                    |
| Absorption correction             | multiscan                                   |                    |
| Refinement method                 | Full-matrix least-squares on F <sup>2</sup> |                    |
| Data / restraints / parameters    | 7006 / 0 / 469                              |                    |
| Goodness-of-fit on F <sup>2</sup> | 0.629                                       |                    |
| Final R indices [I > 2σ(I)]       | R1 = 0.0449, wR2 = 0.1229                   |                    |
| R indices (all data)              | R1 = 0.0671, wR2 = 0.1512                   |                    |
| Largest diff. peak and hole       | 0.398 and -0.349 e.Å <sup>-3</sup>          |                    |

**Table S2.** Crystal data and structure refinement for [PNN]NiCl.

|                                   |                                                        |                               |
|-----------------------------------|--------------------------------------------------------|-------------------------------|
| Identification code               | a7129                                                  |                               |
| Empirical formula                 | C <sub>22</sub> H <sub>24</sub> Cl N <sub>2</sub> Ni P |                               |
| Formula weight                    | 441.56                                                 |                               |
| Temperature                       | 200(2) K                                               |                               |
| Wavelength                        | 0.71073 Å                                              |                               |
| Crystal system                    | Monoclinic                                             |                               |
| Space group                       | P 21/c                                                 |                               |
| Unit cell dimensions              | a = 10.034(3) Å                                        | $\alpha = 90^\circ$ .         |
|                                   | b = 10.622(3) Å                                        | $\beta = 100.008(13)^\circ$ . |
|                                   | c = 19.542(5) Å                                        | $\gamma = 90^\circ$ .         |
| Volume                            | 2051.2(10) Å <sup>3</sup>                              |                               |
| Z                                 | 4                                                      |                               |
| Density (calculated)              | 1.430 Mg/m <sup>3</sup>                                |                               |
| Absorption coefficient            | 1.163 mm <sup>-1</sup>                                 |                               |
| F(000)                            | 920                                                    |                               |
| Crystal size                      | 0.2 x 0.1 x 0.05 mm <sup>3</sup>                       |                               |
| Theta range for data collection   | 2.12 to 20.11°.                                        |                               |
| Index ranges                      | -9<=h<=8, -10<=k<=10, -18<=l<=18                       |                               |
| Reflections collected             | 10908                                                  |                               |
| Independent reflections           | 1943 [R(int) = 0.1551]                                 |                               |
| Completeness to theta = 20.11°    | 99.5 %                                                 |                               |
| Absorption correction             | multiscan                                              |                               |
| Refinement method                 | Full-matrix least-squares on F <sup>2</sup>            |                               |
| Data / restraints / parameters    | 1943 / 0 / 238                                         |                               |
| Goodness-of-fit on F <sup>2</sup> | 1.063                                                  |                               |
| Final R indices [I>2sigma(I)]     | R1 = 0.0583, wR2 = 0.1052                              |                               |
| R indices (all data)              | R1 = 0.1238, wR2 = 0.1240                              |                               |
| Largest diff. peak and hole       | 0.533 and -0.371 e.Å <sup>-3</sup>                     |                               |

**Table S3.** Crystal data and structure refinement for [PNN]NiBr.

|                                   |                                                        |                 |
|-----------------------------------|--------------------------------------------------------|-----------------|
| Identification code               | 8776                                                   |                 |
| Empirical formula                 | C <sub>22</sub> H <sub>24</sub> Br N <sub>2</sub> Ni P |                 |
| Formula weight                    | 486.02                                                 |                 |
| Temperature                       | 293(2) K                                               |                 |
| Wavelength                        | 0.71073 Å                                              |                 |
| Crystal system                    | Monoclinic                                             |                 |
| Space group                       | P 21/c                                                 |                 |
| Unit cell dimensions              | a = 9.1844(4) Å                                        | α = 90°.        |
|                                   | b = 11.8541(5) Å                                       | β = 91.546(2)°. |
|                                   | c = 18.9047(10) Å                                      | γ = 90°.        |
| Volume                            | 2057.46(17) Å <sup>3</sup>                             |                 |
| Z                                 | 4                                                      |                 |
| Density (calculated)              | 1.569 Mg/m <sup>3</sup>                                |                 |
| Absorption coefficient            | 2.972 mm <sup>-1</sup>                                 |                 |
| F(000)                            | 992                                                    |                 |
| Crystal size                      | 0.14 x 0.11 x 0.03 mm <sup>3</sup>                     |                 |
| Theta range for data collection   | 2.16 to 25.04°.                                        |                 |
| Index ranges                      | -10 ≤ h ≤ 10, -13 ≤ k ≤ 14, -22 ≤ l ≤ 22               |                 |
| Reflections collected             | 13481                                                  |                 |
| Independent reflections           | 3619 [R(int) = 0.1238]                                 |                 |
| Completeness to theta = 25.04°    | 99.7 %                                                 |                 |
| Absorption correction             | Semi-empirical from equivalents                        |                 |
| Max. and min. transmission        | 0.8354 and 0.6856                                      |                 |
| Refinement method                 | Full-matrix least-squares on F <sup>2</sup>            |                 |
| Data / restraints / parameters    | 3619 / 0 / 245                                         |                 |
| Goodness-of-fit on F <sup>2</sup> | 1.093                                                  |                 |
| Final R indices [I > 2σ(I)]       | R1 = 0.0758, wR2 = 0.1742                              |                 |
| R indices (all data)              | R1 = 0.1434, wR2 = 0.2308                              |                 |
| Extinction coefficient            | 0.0182(19)                                             |                 |
| Largest diff. peak and hole       | 1.298 and -1.145 e.Å <sup>-3</sup>                     |                 |

**Table S4.** Crystal data and structure refinement for [PNN]NiMe.

|                                   |                                                          |                                                           |
|-----------------------------------|----------------------------------------------------------|-----------------------------------------------------------|
| Identification code               | 3145                                                     |                                                           |
| Empirical formula                 | C <sub>23</sub> H <sub>27</sub> N <sub>2</sub> Ni P      |                                                           |
| Formula weight                    | 421.15                                                   |                                                           |
| Temperature                       | 200(2) K                                                 |                                                           |
| Wavelength                        | 0.71073 Å                                                |                                                           |
| Crystal system                    | Triclinic                                                |                                                           |
| Space group                       | P -1                                                     |                                                           |
| Unit cell dimensions              | a = 10.3899(3) Å<br>b = 10.5707(3) Å<br>c = 11.3703(5) Å | α = 102.5040(10)°.<br>β = 92.234(2)°.<br>γ = 117.474(2)°. |
| Volume                            | 1067.67(6) Å <sup>3</sup>                                |                                                           |
| Z                                 | 2                                                        |                                                           |
| Density (calculated)              | 1.310 Mg/m <sup>3</sup>                                  |                                                           |
| Absorption coefficient            | 0.993 mm <sup>-1</sup>                                   |                                                           |
| F(000)                            | 444                                                      |                                                           |
| Crystal size                      | 0.14 x 0.06 x 0.06 mm <sup>3</sup>                       |                                                           |
| Theta range for data collection   | 2.24 to 24.98°.                                          |                                                           |
| Index ranges                      | -11 ≤ h ≤ 12, -12 ≤ k ≤ 12, -13 ≤ l ≤ 11                 |                                                           |
| Reflections collected             | 10003                                                    |                                                           |
| Independent reflections           | 3727 [R(int) = 0.0625]                                   |                                                           |
| Completeness to theta = 24.98°    | 99.4 %                                                   |                                                           |
| Absorption correction             | Semi-empirical from equivalents                          |                                                           |
| Max. and min. transmission        | 0.9428 and 0.8735                                        |                                                           |
| Refinement method                 | Full-matrix least-squares on F <sup>2</sup>              |                                                           |
| Data / restraints / parameters    | 3727 / 0 / 245                                           |                                                           |
| Goodness-of-fit on F <sup>2</sup> | 1.117                                                    |                                                           |
| Final R indices [I > 2σ(I)]       | R1 = 0.0520, wR2 = 0.1295                                |                                                           |
| R indices (all data)              | R1 = 0.1004, wR2 = 0.1883                                |                                                           |
| Largest diff. peak and hole       | 0.589 and -0.932 e.Å <sup>-3</sup>                       |                                                           |

**Table S5.** Crystal data and structure refinement for [PNN]NiEt.

|                                   |                                                       |                   |
|-----------------------------------|-------------------------------------------------------|-------------------|
| Identification code               | 3374                                                  |                   |
| Empirical formula                 | C <sub>24</sub> H <sub>29</sub> N <sub>2</sub> Ni O P |                   |
| Formula weight                    | 451.17                                                |                   |
| Temperature                       | 200(2) K                                              |                   |
| Wavelength                        | 0.71073 Å                                             |                   |
| Crystal system                    | Monoclinic                                            |                   |
| Space group                       | P 21/n                                                |                   |
| Unit cell dimensions              | a = 15.2700(2) Å                                      | α = 90°.          |
|                                   | b = 9.27600(10) Å                                     | β = 99.7350(10)°. |
|                                   | c = 32.8820(4) Å                                      | γ = 90°.          |
| Volume                            | 4590.49(10) Å <sup>3</sup>                            |                   |
| Z                                 | 8                                                     |                   |
| Density (calculated)              | 1.306 Mg/m <sup>3</sup>                               |                   |
| Absorption coefficient            | 0.932 mm <sup>-1</sup>                                |                   |
| F(000)                            | 1904                                                  |                   |
| Crystal size                      | 0.6 x 0.48 x 0.22 mm <sup>3</sup>                     |                   |
| Theta range for data collection   | 2.13 to 25.02°.                                       |                   |
| Index ranges                      | -18 ≤ h ≤ 17, -10 ≤ k ≤ 10, -39 ≤ l ≤ 39              |                   |
| Reflections collected             | 31891                                                 |                   |
| Independent reflections           | 8024 [R(int) = 0.0696]                                |                   |
| Completeness to theta = 25.02°    | 99.2 %                                                |                   |
| Absorption correction             | Semi-empirical from equivalents                       |                   |
| Max. and min. transmission        | 0.8161 and 0.5925                                     |                   |
| Refinement method                 | Full-matrix least-squares on F <sup>2</sup>           |                   |
| Data / restraints / parameters    | 8024 / 0 / 554                                        |                   |
| Goodness-of-fit on F <sup>2</sup> | 0.890                                                 |                   |
| Final R indices [I > 2σ(I)]       | R1 = 0.0496, wR2 = 0.1432                             |                   |
| R indices (all data)              | R1 = 0.0630, wR2 = 0.1675                             |                   |
| Extinction coefficient            | 0.0304(15)                                            |                   |
| Largest diff. peak and hole       | 0.892 and -1.283 e.Å <sup>-3</sup>                    |                   |

**Table S6.** Crystal data and structure refinement for [PNN]Ni(*n*-hexyl).

|                                   |                                                     |                   |
|-----------------------------------|-----------------------------------------------------|-------------------|
| Identification code               | 8383                                                |                   |
| Empirical formula                 | C <sub>28</sub> H <sub>37</sub> N <sub>2</sub> Ni P |                   |
| Formula weight                    | 491.28                                              |                   |
| Temperature                       | 200(2) K                                            |                   |
| Wavelength                        | 0.71073 Å                                           |                   |
| Crystal system                    | Triclinic                                           |                   |
| Space group                       | P -1                                                |                   |
| Unit cell dimensions              | a = 9.7598(3) Å                                     | α = 68.739(2)°.   |
|                                   | b = 10.5483(2) Å                                    | β = 73.9460(10)°. |
|                                   | c = 14.2416(4) Å                                    | γ = 89.1460(10)°. |
| Volume                            | 1307.11(6) Å <sup>3</sup>                           |                   |
| Z                                 | 2                                                   |                   |
| Density (calculated)              | 1.248 Mg/m <sup>3</sup>                             |                   |
| Absorption coefficient            | 0.821 mm <sup>-1</sup>                              |                   |
| F(000)                            | 524                                                 |                   |
| Crystal size                      | 0.34 x 0.11 x 0.05 mm <sup>3</sup>                  |                   |
| Theta range for data collection   | 2.08 to 25.42°.                                     |                   |
| Index ranges                      | -11 ≤ h ≤ 11, -12 ≤ k ≤ 12, -16 ≤ l ≤ 17            |                   |
| Reflections collected             | 16017                                               |                   |
| Independent reflections           | 4792 [R(int) = 0.0608]                              |                   |
| Completeness to theta = 25.42°    | 99.2 %                                              |                   |
| Absorption correction             | Semi-empirical from equivalents                     |                   |
| Max. and min. transmission        | 0.9291 and 0.8183                                   |                   |
| Refinement method                 | Full-matrix least-squares on F <sup>2</sup>         |                   |
| Data / restraints / parameters    | 4792 / 0 / 284                                      |                   |
| Goodness-of-fit on F <sup>2</sup> | 1.145                                               |                   |
| Final R indices [I > 2σ(I)]       | R1 = 0.0669, wR2 = 0.1673                           |                   |
| R indices (all data)              | R1 = 0.0983, wR2 = 0.2051                           |                   |
| Extinction coefficient            | 0.085(8)                                            |                   |
| Largest diff. peak and hole       | 0.891 and -0.962 e.Å <sup>-3</sup>                  |                   |
